# Supplementary material for: Identification of Factors Driving Doxorubicin-Resistant Ewing Tumor Cells to Survival
Source: MDPI journal article supplement (doi:10.3390/cancers14225498), 2022-11-09
Supplement: s1 [file s1]

Supplemental Table S2. Go terms of DEG expression in ES36-DOX vs ES36 primary tumor cells.

|               | Description                                          | ID         | P adj value | Count/Gene ID |
|---------------|------------------------------------------------------|------------|-------------|---------------|
| DOWNREGULATED | nucleosome assembly                                  | GO:0006334 | 8,02E-07    | 7             |
|               | nucleosome organization                              | GO:0034728 | 5,86E-06    | 7             |
|               | chromatin remodeling                                 | GO:0006338 | 7,53E-06    | 8             |
|               | chromatin assembly                                   | GO:0031497 | 1,82E-05    | 7             |
|               | negative regulation of megakaryocyte differentiation | GO:0045653 | 2,29E-05    | 4             |
|               | DNA conformation change                              | GO:0071103 | 4,31E-05    | 8             |
|               | chromatin assembly or disassembly                    | GO:0006333 | 4,49E-05    | 7             |
|               | protein-DNA complex assembly                         | GO:0065004 | 6,36E-05    | 7             |

|             |                                                          |                        |          |    |
|-------------|----------------------------------------------------------|------------------------|----------|----|
|             | DNA packaging                                            | GO:0006323             | 9,11E-05 | 7  |
|             | protein-DNA complex subunit organization                 | GO:0071824             | 0,000201 | 7  |
| UPREGULATED | anatomical structure formation involved in morphogenesis | GO:004864 <sub>6</sub> | 5,11E-09 | 15 |
|             | anatomical structure morphogenesis                       | GO:000965 <sub>3</sub> | 1,22E-05 | 17 |
|             | circulatory system development                           | GO:00723 <sub>59</sub> | 1,43E-05 | 12 |
|             | blood vessel development                                 | GO:000156 <sub>8</sub> | 2,87E-05 | 10 |
|             | angiogenesis                                             | GO:000152 <sub>5</sub> | 3,42E-05 | 9  |
|             | vasculature development                                  | GO:000194 <sub>4</sub> | 4,35E-05 | 10 |
|             | platelet aggregation                                     | GO:007052 <sub>7</sub> | 6,08E-05 | 5  |
|             | regulation of cellular component movement                | GO:005127 <sub>0</sub> | 0,0001   | 11 |

|                              |            |          |    |
|------------------------------|------------|----------|----|
| actin filament-based process | GO:0030029 | 0,000111 | 10 |
| blood vessel morphogenesis   | GO:0048514 | 0,000142 | 9  |

**Abbreviations:** DEG, differentially expressed genes; GO, gene ontology;
