# Supplementary material for: Identification of Factors Driving Doxorubicin-Resistant Ewing Tumor Cells to Survival
Source: MDPI journal article supplement (doi:10.3390/cancers14225498), 2022-11-09
Supplement: s1 [file s1]

Supplemental Table S3. Go terms of DEG expression in ES36-DOX (Doxorubicin-treated Ewing’s sarcoma cells ES36) vs M19-DOX doxorubicin-treated human fibroblasts M19.

|             | Description                                              | ID         | P adj value | Count/Gene ID |
|-------------|----------------------------------------------------------|------------|-------------|---------------|
| UPREGULATED | platelet aggregation                                     | GO:0070527 | 7,09E-09    | 7             |
|             | homotypic cell-cell adhesion                             | GO:0034109 | 5,35E-08    | 7             |
|             | platelet activation                                      | GO:0030168 | 6,19E-07    | 7             |
|             | anatomical structure formation involved in morphogenesis | GO:0048646 | 1,46E-06    | 13            |
|             | actin cytoskeleton organization                          | GO:0030036 | 2,17E-06    | 11            |
|             | wound healing                                            | GO:0042060 | 5,25E-06    | 9             |
|             | actin filament-based process                             | GO:0030029 | 7,44E-06    | 11            |
|             | actomyosin structure organization                        | GO:0031032 | 1,16E-05    | 7             |
|             | blood coagulation                                        | GO:0007596 | 3,24E-05    | 7             |
|             | coagulation                                              | GO:0050817 | 3,77E-05    | 7             |

**Abbreviations:** DEG, differentially expressed genes; GO, gene ontology;
