# Supplementary material for: Identification of Factors Driving Doxorubicin-Resistant Ewing Tumor Cells to Survival
Source: MDPI journal article supplement (doi:10.3390/cancers14225498), 2022-11-09
Supplement: s1 [file s1]

Supplemental Table S1. Go terms of DEG expression in ES36 vs M19 fibroblasts.

|             | Description                                         | ID         | P adj value | Count/Gene ID |
|-------------|-----------------------------------------------------|------------|-------------|---------------|
| DOWNREGU    | regulation of supramolecular fiber organization     | GO:1902903 | 0,017968    | 6             |
| UPREGULATED | glycolytic process                                  | GO:0006096 | 2,96E-12    | 9             |
|             | ATP generation from ADP                             | GO:0006757 | 3,31E-12    | 9             |
|             | ADP metabolic process                               | GO:0046031 | 7,85E-12    | 9             |
|             | nucleoside diphosphate phosphorylation              | GO:0006165 | 2,07E-11    | 9             |
|             | nucleotide phosphorylation                          | GO:0046939 | 2,27E-11    | 9             |
|             | purine nucleoside diphosphate metabolic process     | GO:0009135 | 2,72E-11    | 9             |
|             | purine ribonucleoside diphosphate metabolic process | GO:0009179 | 2,72E-11    | 9             |
|             | pyruvate metabolic process                          | GO:0006090 | 3,24E-11    | 9             |

|  |                            |            |          |   |
|--|----------------------------|------------|----------|---|
|  | ribonucleoside diphosphate | GO:0009185 |          |   |
|  | metabolic process          |            | 4,57E-11 | 9 |

**Abbreviations:** DEG, differentially expressed genes; GO, gene ontology;
